# Supplementary material
Source: Springer Nature journal article supplement (https://www.springermedizin.de/resource/supplementary/12889_2012_4207_MOESM3_ESM.pdf/9492412)
Supplement: MOESM3 [file 9492412]

Hear about HPV vaccination  
in the locality

Passive decision-making

No consult or additional  
information sought

Vaccinate

Not vaccinate

Active decision-making

Consult or additional information  
sought

Vaccinate

Not vaccinate
